# Supplementary material for: Phenotypic Covariance of Longevity, Immunity and Stress Resistance in the Caenorhabditis Nematodes
Source: PLoS One. 2010 Apr 1;5(4):e9978. doi: 10.1371/journal.pone.0009978 (PMC2848519; doi:10.1371/journal.pone.0009978)
Supplement: Table S2 — List of p values for all the wildtpe isolates compared to the type C. elegans strain (N2) for the assays performed. P values in bold indicate significance after testing for multiplicity using the Bonferroni correction. (0.02 MB XLS) [file pone.0009978.s006.xls]

## Sheet: Sheet1
	Lifespan	Metallotolerance	NCTC8532
N2/N2
N2/RC301	>0.2	>0.2	>0.2
N2/CB4856	>0.2	<0.0001	<0.001
N2/ED3033	>0.2	>0.2	<0.0001
N2/ED3034	>0.2	>0.2	<0.0001
N2/JU1082	<0.0001	<0.01	<0.0001
N2/JU1084	<0.0001	<0.0001	<0.0001
N2/SB129	<0.0001	>0.1	<0.0001
N2/LKC28	<0.0001	>0.2	<0.0001
