# Supplementary material for: Phenotypic Covariance of Longevity, Immunity and Stress Resistance in the Caenorhabditis Nematodes
Source: PLoS One. 2010 Apr 1;5(4):e9978. doi: 10.1371/journal.pone.0009978 (PMC2848519; doi:10.1371/journal.pone.0009978)
Supplement: Table S4 — Complete list of the p values between type strains (N2 and AF16) and their daf-2 mutant counterparts (CB1370 and PS5531) for the various assays performed. P values in bold indicate significance after testing for multiplicity using the Bonferroni correction. (0.01 MB XLS) [file pone.0009978.s008.xls]

## Sheet: Sheet1
	Lifespan	thermotolerance	Metallotolerance	NCTC8532	PA01	Sl1344
N2/N2
N2/CB1370	<0.0001	<0.0001	<0.0001	<0.0001	<0.0001	>0.02
N2/PS5531	<0.001	<0.0001	<0.0001	<0.0001	<0.0001	<0.01
AF16/CB1370	<0.0001	>0.2	<0.0001	<0.0001	<0.0001	>0.02
AF16/PS5531	<0.0001	<0.001	<0.0001	<0.02	<0.0001	<0.01
CB1370/PS5531	<0.0001	<0.001	<0.0001	<0.0001	<0.01	<0.01
