# Supplementary material for: Phenotypic Covariance of Longevity, Immunity and Stress Resistance in the Caenorhabditis Nematodes
Source: PLoS One. 2010 Apr 1;5(4):e9978. doi: 10.1371/journal.pone.0009978 (PMC2848519; doi:10.1371/journal.pone.0009978)
Supplement: Table S8 — Table representing the adjusted DAF-16 core regulon using the GOTERM BP_ALL and GOTERM BP_2 gene categories which revealed significant enrichment for genes involved in the regulation of lifespan, stress response, transport, localization and metabolism. (0.13 MB XLS) [file pone.0009978.s012.xls]

## Sheet: CELEGANS_GOTERMBP_ALL
Category	Term	Count	%	PValue	Genes	List Total	Pop Hits	Pop Total	Fold Enrichment	Bonferroni	Benjamini	FDR
GOTERM_BP_ALL	GO:0008610~lipid biosynthetic process	8	0.0118	0.0798735	WBGene00001399, WBGene00005019, WBGene00017262, WBGene00001397, WBGene00017429, WBGene00001398, WBGene00013920, WBGene00000761,	375	88	8801	2.13358	1	0.903778	76.2029
GOTERM_BP_ALL	GO:0006270~DNA replication initiation	3	0.0044	0.032821	WBGene00003157, WBGene00003156, WBGene00003154,	375	7	8801	10.0583	1	0.77449	43.7587
GOTERM_BP_ALL	GO:0032787~monocarboxylic acid metabolic process	9	0.0133	0.00494045	WBGene00001399, WBGene00000929, WBGene00001564, WBGene00001523, WBGene00001397, WBGene00001398, WBGene00019151, WBGene00008565, WBGene00015889,	375	63	8801	3.35276	0.999962	0.357303	8.18667
GOTERM_BP_ALL	GO:0005976~polysaccharide metabolic process	6	0.0088	0.0315742	WBGene00005019, WBGene00002983, WBGene00007425, WBGene00008842, WBGene00007472, WBGene00007473, WBGene00007466, WBGene00017262, WBGene00000465, WBGene00016534,	375	42	8801	3.35276	1	0.799415	42.4952
GOTERM_BP_ALL	GO:0005975~carbohydrate metabolic process	23	0.0339	0.000954465	WBGene00003097, WBGene00001404, WBGene00022199, WBGene00001564, WBGene00007425, WBGene00008842, WBGene00007472, WBGene00007473, WBGene00007466, WBGene00017262, WBGene00000465, WBGene00018491, WBGene00016848, WBGene00019151, WBGene00008948, WBGene00001686, WBGene00000041, WBGene00020509, WBGene00005019, WBGene00017103, WBGene00002983, WBGene00006610, WBGene00020593, WBGene00006602, WBGene00006602,…	375	250	8801	2.15918	0.859205	0.0933716	1.63334
GOTERM_BP_ALL	GO:0006261~DNA-dependent DNA replication	4	0.0059	0.0644612	WBGene00003157, WBGene00003156, WBGene00003154, WBGene00004064,	375	22	8801	4.26715	1	0.874152	68.3087
GOTERM_BP_ALL	GO:0006260~DNA replication	7	0.0103	0.0985722	WBGene00003157, WBGene00018849, WBGene00017546, WBGene00003156, WBGene00002985, WBGene00003154, WBGene00004064,	375	75	8801	2.19047	1	0.92794	83.2986
GOTERM_BP_ALL	GO:0006520~amino acid metabolic process	16	0.0236	0.000741677	WBGene00019730, WBGene00007508, WBGene00007509, WBGene00013516, WBGene00012326, WBGene00009628, WBGene00000197, WBGene00008458, WBGene00006936, WBGene00003074, WBGene00014095, WBGene00016294, WBGene00011938, WBGene00007197, WBGene00021355, WBGene00001993, WBGene00018282,	375	138	8801	2.72108	0.781993	0.0857047	1.2714
GOTERM_BP_ALL	GO:0006519~amino acid and derivative metabolic process	17	0.0251	0.00123794	WBGene00019730, WBGene00007508, WBGene00007509, WBGene00013516, WBGene00012326, WBGene00001523, WBGene00009628, WBGene00000197, WBGene00008458, WBGene00006936, WBGene00003074, WBGene00014095, WBGene00016294, WBGene00011938, WBGene00007197, WBGene00021355, WBGene00001993, WBGene00018282,	375	160	8801	2.49362	0.921375	0.109163	2.11358
GOTERM_BP_ALL	GO:0006732~coenzyme metabolic process	13	0.0192	0.00634381	WBGene00001564, WBGene00006912, WBGene00004068, WBGene00018491, WBGene00000229, WBGene00015889, WBGene00000041, WBGene00000207, WBGene00000929, WBGene00001758, WBGene00006917, WBGene00016630, WBGene00000761,	375	124	8801	2.46049	0.999998	0.407031	10.3944
GOTERM_BP_ALL	GO:0051186~cofactor metabolic process	15	0.0221	0.00687357	WBGene00006912, WBGene00001564, WBGene00004068, WBGene00018491, WBGene00000229, WBGene00015889, WBGene00000041, WBGene00000207, WBGene00000929, WBGene00001758, WBGene00006917, WBGene00019886, WBGene00003154, WBGene00016630, WBGene00000761,	375	157	8801	2.24229	0.999999	0.408119	11.2147
GOTERM_BP_ALL	GO:0006508~proteolysis	27	0.0398	0.0521359	WBGene00018256, WBGene00008948, WBGene00001650, WBGene00018225, WBGene00000784, WBGene00000215, WBGene00000039, WBGene00008439, WBGene00004003, WBGene00003522, WBGene00006739, WBGene00018106, WBGene00000776, WBGene00018015, WBGene00018849, WBGene00007508, WBGene00007509, WBGene00000789, WBGene00000217, WBGene00018426, WBGene00015359, WBGene00019673, WBGene00000788, WBGene00019682, WBGene00003957,…	375	438	8801	1.44674	1	0.839923	60.2836
GOTERM_BP_ALL	GO:0010259~multicellular organismal aging	30	0.0442	2.7909e-10	WBGene00000169, WBGene00007016, WBGene00000479, WBGene00015259, WBGene00009898, WBGene00004798, WBGene00000929, WBGene00003473, WBGene00000103, WBGene00009213, WBGene00002026, WBGene00002016, WBGene00001758, WBGene00001500, WBGene00001564, WBGene00010791, WBGene00000102, WBGene00019472, WBGene00010790, WBGene00004742, WBGene00010745, WBGene00000912, WBGene00004932, WBGene00002101, WBGene00001399,…	375	177	8801	3.97785	5.72972e-07	2.86486e-07	4.81311e-07
GOTERM_BP_ALL	GO:0006986~response to unfolded protein	7	0.0103	0.00910937	WBGene00002018, WBGene00011480, WBGene00002019, WBGene00002007, WBGene00002026, WBGene00002016, WBGene00002013,	375	43	8801	3.82059	1	0.465403	14.5994
GOTERM_BP_ALL	GO:0006984~ER-nuclear signaling pathway	5	0.0074	0.000549551	WBGene00002018, WBGene00002019, WBGene00002007, WBGene00002026, WBGene00002016,	375	10	8801	11.7347	0.676495	0.0831494	0.943522
GOTERM_BP_ALL	GO:0030968~unfolded protein response	5	0.0074	0.000549551	WBGene00002018, WBGene00002019, WBGene00002007, WBGene00002026, WBGene00002016,	375	10	8801	11.7347	0.676495	0.0831494	0.943522
GOTERM_BP_ALL	GO:0016051~carbohydrate biosynthetic process	5	0.0074	0.0704321	WBGene00005019, WBGene00017262, WBGene00006602, WBGene00006602, WBGene00019151,	375	37	8801	3.17153	1	0.878987	71.6218
GOTERM_BP_ALL	GO:0008340~determination of adult life span	30	0.0442	2.7909e-10	WBGene00000169, WBGene00007016, WBGene00000479, WBGene00015259, WBGene00009898, WBGene00004798, WBGene00000929, WBGene00003473, WBGene00000103, WBGene00009213, WBGene00002026, WBGene00002016, WBGene00001758, WBGene00001500, WBGene00001564, WBGene00010791, WBGene00000102, WBGene00019472, WBGene00010790, WBGene00004742, WBGene00010745, WBGene00000912, WBGene00004932, WBGene00002101, WBGene00001399,…	375	177	8801	3.97785	5.72972e-07	2.86486e-07	4.81311e-07
GOTERM_BP_ALL	GO:0019752~carboxylic acid metabolic process	26	0.0383	7.53766e-06	WBGene00019730, WBGene00013516, WBGene00000197, WBGene00008458, WBGene00001397, WBGene00008565, WBGene00003074, WBGene00000929, WBGene00016294, WBGene00021355, WBGene00007508, WBGene00007509, WBGene00001564, WBGene00012326, WBGene00001523, WBGene00009628, WBGene00018491, WBGene00019151, WBGene00006936, WBGene00015889, WBGene00014095, WBGene00001399, WBGene00011938, WBGene00007197, WBGene00001398,…	375	222	8801	2.74866	0.0153558	0.00309019	0.0129984
GOTERM_BP_ALL	GO:0065008~regulation of biological quality	23	0.0339	0.0105824	WBGene00002045, WBGene00007016, WBGene00018256, WBGene00006698, WBGene00009617, WBGene00003053, WBGene00011495, WBGene00000381, WBGene00001465, WBGene00010266, WBGene00006373, WBGene00015510, WBGene00004735, WBGene00022201, WBGene00001840, WBGene00009805, WBGene00017640, WBGene00015916, WBGene00009804, WBGene00001398, WBGene00003963, WBGene00001500, WBGene00003964,	375	305	8801	1.76982	1	0.494671	16.7626
GOTERM_BP_ALL	GO:0033205~cytokinesis during cell cycle	3	0.0044	0.04255	WBGene00000465, WBGene00000064, WBGene00000063,	375	8	8801	8.801	1	0.796903	52.7574
GOTERM_BP_ALL	GO:0048468~cell development	19	0.028	0.00871113	WBGene00002045, WBGene00006912, WBGene00003052, WBGene00019711, WBGene00001598, WBGene00017571, WBGene00000479, WBGene00000217, WBGene00000802, WBGene00006760, WBGene00000799, WBGene00015776, WBGene00001558, WBGene00017640, WBGene00000215, WBGene00004268, WBGene00004242, WBGene00004243, WBGene00000950,	375	229	8801	1.94724	1	0.461727	14.0056
GOTERM_BP_ALL	GO:0019725~cellular homeostasis	8	0.0118	0.0690011	WBGene00009805, WBGene00017640, WBGene00009804, WBGene00011495, WBGene00003963, WBGene00001500, WBGene00003964, WBGene00015510,	375	85	8801	2.20888	1	0.877165	70.8589
GOTERM_BP_ALL	GO:0006952~defense response	8	0.0118	0.0074802	WBGene00006923, WBGene00008591, WBGene00008199, WBGene00003767, WBGene00009213, WBGene00003769, WBGene00004758, WBGene00000912,	375	54	8801	3.47694	1	0.423351	12.1453
GOTERM_BP_ALL	GO:0006950~response to stress	24	0.0354	9.35505e-05	WBGene00007516, WBGene00018849, WBGene00011480, WBGene00018256, WBGene00013924, WBGene00013244, WBGene00002985, WBGene00002263, WBGene00020423, WBGene00004742, WBGene00001852, WBGene00000912, WBGene00004064, WBGene00002018, WBGene00003473, WBGene00010408, WBGene00002019, WBGene00002007, WBGene00002016, WBGene00002026, WBGene00001758, WBGene00002013, WBGene00000840, WBGene00013220,	375	227	8801	2.48134	0.174749	0.0237226	0.161212
GOTERM_BP_ALL	GO:0008286~insulin receptor signaling pathway	3	0.0044	0.0531985	WBGene00000103, WBGene00000102, WBGene00000912,	375	9	8801	7.82311	1	0.841154	61.0445
GOTERM_BP_ALL	GO:0006457~protein folding	11	0.0162	0.0345511	WBGene00002018, WBGene00011480, WBGene00002019, WBGene00002007, WBGene00000381, WBGene00002026, WBGene00002016, WBGene00000802, WBGene00002013, WBGene00000883, WBGene00010052,	375	122	8801	2.11609	1	0.770813	45.4687
GOTERM_BP_ALL	GO:0044271~nitrogen compound biosynthetic process	6	0.0088	0.0315742	WBGene00019730, WBGene00012326, WBGene00011938, WBGene00001523, WBGene00007197, WBGene00008458,	375	42	8801	3.35276	1	0.799415	42.4952
GOTERM_BP_ALL	GO:0044270~nitrogen compound catabolic process	5	0.0074	0.0408192	WBGene00013516, WBGene00007197, WBGene00021355, WBGene00001993, WBGene00018282,	375	31	8801	3.78538	1	0.800979	51.2628
GOTERM_BP_ALL	GO:0008219~cell death	14	0.0206	0.000752801	WBGene00002045, WBGene00006912, WBGene00019711, WBGene00000479, WBGene00000217, WBGene00000802, WBGene00006760, WBGene00000799, WBGene00015776, WBGene00001558, WBGene00000215, WBGene00004268, WBGene00017640, WBGene00000950,	375	110	8801	2.98701	0.786919	0.082308	1.29035
GOTERM_BP_ALL	GO:0044264~cellular polysaccharide metabolic process	6	0.0088	0.0315742	WBGene00005019, WBGene00002983, WBGene00007425, WBGene00008842, WBGene00007472, WBGene00007473, WBGene00007466, WBGene00017262, WBGene00000465, WBGene00016534,	375	42	8801	3.35276	1	0.799415	42.4952
GOTERM_BP_ALL	GO:0009607~response to biotic stimulus	9	0.0133	0.00110573	WBGene00002018, WBGene00011480, WBGene00002019, WBGene00003767, WBGene00002007, WBGene00002026, WBGene00002016, WBGene00003769, WBGene00002013,	375	50	8801	4.22448	0.896824	0.102514	1.88988
GOTERM_BP_ALL	GO:0044262~cellular carbohydrate metabolic process	15	0.0221	0.00064308	WBGene00022199, WBGene00001564, WBGene00007425, WBGene00008842, WBGene00007472, WBGene00007473, WBGene00007466, WBGene00017262, WBGene00000465, WBGene00018491, WBGene00001686, WBGene00019151, WBGene00000041, WBGene00005019, WBGene00002983, WBGene00006610, WBGene00006602, WBGene00006602, WBGene00016534,	375	122	8801	2.88557	0.733043	0.08428	1.10326
GOTERM_BP_ALL	GO:0044255~cellular lipid metabolic process	14	0.0206	0.0327125	WBGene00017262, WBGene00017429, WBGene00001397, WBGene00008565, WBGene00015889, WBGene00013920, WBGene00005019, WBGene00001399, WBGene00020593, WBGene00001398, WBGene00004995, WBGene00020587, WBGene00008832, WBGene00000761,	375	173	8801	1.89925	1	0.788146	43.6498
GOTERM_BP_ALL	GO:0044249~cellular biosynthetic process	32	0.0472	0.0429652	WBGene00019730, WBGene00000197, WBGene00008458, WBGene00001397, WBGene00000229, WBGene00003074, WBGene00018174, WBGene00004424, WBGene00000929, WBGene00004496, WBGene00020868, WBGene00004449, WBGene00006917, WBGene00019886, WBGene00006912, WBGene00012326, WBGene00001523, WBGene00002083, WBGene00004068, WBGene00001226, WBGene00019151, WBGene00006936, WBGene00006566, WBGene00018996, WBGene00001399,…	375	530	8801	1.41702	1	0.788696	53.1095
GOTERM_BP_ALL	GO:0044248~cellular catabolic process	14	0.0206	0.0889796	WBGene00022199, WBGene00013516, WBGene00001564, WBGene00007425, WBGene00008842, WBGene00007472, WBGene00007473, WBGene00007466, WBGene00018491, WBGene00008948, WBGene00001686, WBGene00000041, WBGene00000799, WBGene00007197, WBGene00021355, WBGene00001993, WBGene00013220, WBGene00018282,	375	202	8801	1.62659	1	0.916646	79.9537
GOTERM_BP_ALL	GO:0006118~electron transport	29	0.0428	0.000120185	WBGene00015400, WBGene00001476, WBGene00000373, WBGene00017565, WBGene00019565, WBGene00010707, WBGene00010083, WBGene00008565, WBGene00010705, WBGene00010052, WBGene00015043, WBGene00016061, WBGene00009805, WBGene00009804, WBGene00021355, WBGene00011676, WBGene00003778, WBGene00007536, WBGene00012326, WBGene00001523, WBGene00011495, WBGene00019472, WBGene00015040, WBGene00017874, WBGene00016728,…	375	309	8801	2.20262	0.218668	0.0270447	0.207065
GOTERM_BP_ALL	GO:0008202~steroid metabolic process	4	0.0059	0.0644612	WBGene00005019, WBGene00017262, WBGene00017429, WBGene00008832,	375	22	8801	4.26715	1	0.874152	68.3087
GOTERM_BP_ALL	GO:0006915~apoptosis	7	0.0103	0.0471302	WBGene00006760, WBGene00002045, WBGene00000799, WBGene00015776, WBGene00019711, WBGene00017640, WBGene00000479,	375	62	8801	2.64976	1	0.813603	56.507
GOTERM_BP_ALL	GO:0008152~metabolic process	223	0.3289	0.000674819	WBGene00003648, WBGene00003156, WBGene00008565, WBGene00000473, WBGene00004735, WBGene00004424, WBGene00006610, WBGene00001758, WBGene00001915, WBGene00017220, WBGene00012326, WBGene00007885, WBGene00007425, WBGene00008842, WBGene00007472, WBGene00007473, WBGene00007466, WBGene00017262, WBGene00019472, WBGene00011495, WBGene00017316, WBGene00000381, WBGene00000975, WBGene00015889, WBGene00017546,…	375	4501	8801	1.16278	0.749894	0.0829717	1.15742
GOTERM_BP_ALL	GO:0042759~long-chain fatty acid biosynthetic process	2	0.0029	0.0831891	WBGene00001397, WBGene00001398,	375	2	8801	23.4693	1	0.904268	77.6392
GOTERM_BP_ALL	GO:0006091~generation of precursor metabolites and energy	39	0.0575	8.51259e-07	WBGene00015400, WBGene00001476, WBGene00000373, WBGene00017565, WBGene00019565, WBGene00010707, WBGene00010083, WBGene00008565, WBGene00010705, WBGene00000229, WBGene00000041, WBGene00015043, WBGene00010052, WBGene00016061, WBGene00009805, WBGene00006610, WBGene00009804, WBGene00011676, WBGene00021355, WBGene00006917, WBGene00003778, WBGene00007536, WBGene00006912, WBGene00001564, WBGene00012326,…	375	384	8801	2.3836	0.00174611	0.000436813	0.00146805
GOTERM_BP_ALL	GO:0006629~lipid metabolic process	20	0.0295	0.0260525	WBGene00012201, WBGene00017262, WBGene00001397, WBGene00017316, WBGene00017429, WBGene00008565, WBGene00013101, WBGene00015889, WBGene00013920, WBGene00007857, WBGene00020258, WBGene00004735, WBGene00001399, WBGene00005019, WBGene00020593, WBGene00004995, WBGene00001398, WBGene00020587, WBGene00000761, WBGene00008832,	375	276	8801	1.70068	1	0.750827	36.571
GOTERM_BP_ALL	GO:0006084~acetyl-CoA metabolic process	4	0.0059	0.0644612	WBGene00001564, WBGene00018491, WBGene00016630, WBGene00000041,	375	22	8801	4.26715	1	0.874152	68.3087
GOTERM_BP_ALL	GO:0006082~organic acid metabolic process	26	0.0383	7.53766e-06	WBGene00019730, WBGene00013516, WBGene00000197, WBGene00008458, WBGene00001397, WBGene00008565, WBGene00003074, WBGene00000929, WBGene00016294, WBGene00021355, WBGene00007508, WBGene00007509, WBGene00001564, WBGene00012326, WBGene00001523, WBGene00009628, WBGene00018491, WBGene00019151, WBGene00006936, WBGene00015889, WBGene00014095, WBGene00001399, WBGene00011938, WBGene00007197, WBGene00001398,…	375	222	8801	2.74866	0.0153558	0.00309019	0.0129984
GOTERM_BP_ALL	GO:0018987~osmoregulation	14	0.0206	0.0354299	WBGene00002045, WBGene00007016, WBGene00006698, WBGene00003053, WBGene00000381, WBGene00001465, WBGene00010266, WBGene00006373, WBGene00004735, WBGene00022201, WBGene00001840, WBGene00015916, WBGene00001398, WBGene00003963,	375	175	8801	1.87755	1	0.772623	46.3184
GOTERM_BP_ALL	GO:0006869~lipid transport	4	0.0059	0.0332325	WBGene00017220, WBGene00006925, WBGene00006928, WBGene00008832,	375	17	8801	5.5222	1	0.764381	44.17
GOTERM_BP_ALL	GO:0051789~response to protein stimulus	7	0.0103	0.00910937	WBGene00002018, WBGene00011480, WBGene00002019, WBGene00002007, WBGene00002026, WBGene00002016, WBGene00002013,	375	43	8801	3.82059	1	0.465403	14.5994
GOTERM_BP_ALL	GO:0009408~response to heat	3	0.0044	0.0646712	WBGene00003473, WBGene00004742, WBGene00000912,	375	10	8801	7.0408	1	0.867145	68.4311
GOTERM_BP_ALL	GO:0007626~locomotory behavior	47	0.0693	0.0746546	WBGene00017075, WBGene00003485, WBGene00003052, WBGene00007016, WBGene00000197, WBGene00004753, WBGene00003231, WBGene00008948, WBGene00001650, WBGene00006373, WBGene00004388, WBGene00000041, WBGene00020868, WBGene00015916, WBGene00000039, WBGene00010054, WBGene00001591, WBGene00022781, WBGene00000776, WBGene00001915, WBGene00006497, WBGene00003965, WBGene00002045, WBGene00011480, WBGene00003160,…	375	876	8801	1.2592	1	0.890556	73.7647
GOTERM_BP_ALL	GO:0016265~death	14	0.0206	0.000752801	WBGene00002045, WBGene00006912, WBGene00019711, WBGene00000479, WBGene00000217, WBGene00000802, WBGene00006760, WBGene00000799, WBGene00015776, WBGene00001558, WBGene00000215, WBGene00004268, WBGene00017640, WBGene00000950,	375	110	8801	2.98701	0.786919	0.082308	1.29035
GOTERM_BP_ALL	GO:0009084~glutamine family amino acid biosynthetic process	3	0.0044	0.0897396	WBGene00012326, WBGene00011938, WBGene00007197,	375	12	8801	5.86733	1	0.913139	80.2402
GOTERM_BP_ALL	GO:0012501~programmed cell death	10	0.0147	0.0066162	WBGene00006760, WBGene00002045, WBGene00000799, WBGene00006912, WBGene00015776, WBGene00019711, WBGene00017640, WBGene00000479, WBGene00000217, WBGene00000802,	375	80	8801	2.93367	0.999999	0.407948	10.817
GOTERM_BP_ALL	GO:0030104~water homeostasis	14	0.0206	0.0254656	WBGene00002045, WBGene00007016, WBGene00006698, WBGene00003053, WBGene00000381, WBGene00001465, WBGene00010266, WBGene00006373, WBGene00004735, WBGene00022201, WBGene00001840, WBGene00015916, WBGene00001398, WBGene00003963,	375	167	8801	1.96749	1	0.751828	35.9087
GOTERM_BP_ALL	GO:0009310~amine catabolic process	5	0.0074	0.0408192	WBGene00013516, WBGene00007197, WBGene00021355, WBGene00001993, WBGene00018282,	375	31	8801	3.78538	1	0.800979	51.2628
GOTERM_BP_ALL	GO:0016244~non-apoptotic programmed cell death	3	0.0044	0.0897396	WBGene00006912, WBGene00000217, WBGene00000802,	375	12	8801	5.86733	1	0.913139	80.2402
GOTERM_BP_ALL	GO:0009309~amine biosynthetic process	6	0.0088	0.0315742	WBGene00019730, WBGene00012326, WBGene00011938, WBGene00001523, WBGene00007197, WBGene00008458,	375	42	8801	3.35276	1	0.799415	42.4952
GOTERM_BP_ALL	GO:0009308~amine metabolic process	21	0.031	0.000159045	WBGene00019730, WBGene00007508, WBGene00007509, WBGene00013516, WBGene00012326, WBGene00001523, WBGene00007425, WBGene00008842, WBGene00007472, WBGene00007473, WBGene00007466, WBGene00009628, WBGene00000465, WBGene00008458, WBGene00000197, WBGene00006936, WBGene00003074, WBGene00014095, WBGene00016294, WBGene00002983, WBGene00011938, WBGene00007197, WBGene00021355, WBGene00001993, WBGene00018282,…	375	190	8801	2.59398	0.278588	0.0321271	0.27393
GOTERM_BP_ALL	GO:0001676~long-chain fatty acid metabolic process	2	0.0029	0.0831891	WBGene00001397, WBGene00001398,	375	2	8801	23.4693	1	0.904268	77.6392
GOTERM_BP_ALL	GO:0009063~amino acid catabolic process	5	0.0074	0.0228715	WBGene00013516, WBGene00007197, WBGene00021355, WBGene00001993, WBGene00018282,	375	26	8801	4.51333	1	0.723016	32.902
GOTERM_BP_ALL	GO:0043071~positive regulation of non-apoptotic programmed cell death	3	0.0044	0.032821	WBGene00006912, WBGene00000217, WBGene00000802,	375	7	8801	10.0583	1	0.77449	43.7587
GOTERM_BP_ALL	GO:0043070~regulation of non-apoptotic programmed cell death	3	0.0044	0.0897396	WBGene00006912, WBGene00000217, WBGene00000802,	375	12	8801	5.86733	1	0.913139	80.2402
GOTERM_BP_ALL	GO:0006807~nitrogen compound metabolic process	23	0.0339	3.04672e-05	WBGene00019730, WBGene00017440, WBGene00007508, WBGene00007509, WBGene00013516, WBGene00012326, WBGene00001523, WBGene00007425, WBGene00008842, WBGene00007472, WBGene00007473, WBGene00007466, WBGene00009628, WBGene00000465, WBGene00008458, WBGene00000197, WBGene00017429, WBGene00006936, WBGene00003074, WBGene00014095, WBGene00016294, WBGene00002983, WBGene00011938, WBGene00007197, WBGene00021355,…	375	197	8801	2.74007	0.060634	0.00889593	0.0525299
GOTERM_BP_ALL	GO:0043068~positive regulation of programmed cell death	4	0.0059	0.0644612	WBGene00006912, WBGene00017640, WBGene00000217, WBGene00000802,	375	22	8801	4.26715	1	0.874152	68.3087
GOTERM_BP_ALL	GO:0009058~biosynthetic process	42	0.0619	0.0169294	WBGene00019730, WBGene00010197, WBGene00008458, WBGene00000197, WBGene00001397, WBGene00017429, WBGene00008948, WBGene00000229, WBGene00018174, WBGene00003074, WBGene00004424, WBGene00005019, WBGene00000929, WBGene00004496, WBGene00020820, WBGene00020868, WBGene00004449, WBGene00006917, WBGene00019886, WBGene00006912, WBGene00012326, WBGene00001523, WBGene00002083, WBGene00009628, WBGene00017262,…	375	689	8801	1.43064	1	0.622322	25.5066
GOTERM_BP_ALL	GO:0043067~regulation of programmed cell death	6	0.0088	0.0376519	WBGene00002045, WBGene00006912, WBGene00017640, WBGene00000479, WBGene00000217, WBGene00000802,	375	44	8801	3.20036	1	0.780243	48.4116
GOTERM_BP_ALL	GO:0000281~cytokinesis after mitosis	3	0.0044	0.032821	WBGene00000465, WBGene00000064, WBGene00000063,	375	7	8801	10.0583	1	0.77449	43.7587
GOTERM_BP_ALL	GO:0006801~superoxide metabolic process	3	0.0044	0.04255	WBGene00004931, WBGene00004932, WBGene00007036,	375	8	8801	8.801	1	0.796903	52.7574
GOTERM_BP_ALL	GO:0006800~oxygen and reactive oxygen species metabolic process	4	0.0059	0.0125768	WBGene00004931, WBGene00004932, WBGene00013220, WBGene00007036,	375	12	8801	7.82311	1	0.534308	19.6092
GOTERM_BP_ALL	GO:0007568~aging	30	0.0442	2.7909e-10	WBGene00000169, WBGene00007016, WBGene00000479, WBGene00015259, WBGene00009898, WBGene00004798, WBGene00000929, WBGene00003473, WBGene00000103, WBGene00009213, WBGene00002026, WBGene00002016, WBGene00001758, WBGene00001500, WBGene00001564, WBGene00010791, WBGene00000102, WBGene00019472, WBGene00010790, WBGene00004742, WBGene00010745, WBGene00000912, WBGene00004932, WBGene00002101, WBGene00001399,…	375	177	8801	3.97785	5.72972e-07	2.86486e-07	4.81311e-07
GOTERM_BP_ALL	GO:0042592~homeostatic process	22	0.0324	0.00519025	WBGene00002045, WBGene00007016, WBGene00006698, WBGene00009617, WBGene00003053, WBGene00011495, WBGene00000381, WBGene00001465, WBGene00010266, WBGene00006373, WBGene00015510, WBGene00004735, WBGene00022201, WBGene00001840, WBGene00009805, WBGene00017640, WBGene00015916, WBGene00009804, WBGene00001398, WBGene00003963, WBGene00001500, WBGene00003964,	375	269	8801	1.91943	0.999977	0.359264	8.58335
GOTERM_BP_ALL	GO:0008652~amino acid biosynthetic process	5	0.0074	0.0367401	WBGene00019730, WBGene00012326, WBGene00011938, WBGene00007197, WBGene00008458,	375	30	8801	3.91156	1	0.778387	47.5622
GOTERM_BP_ALL	GO:0048878~chemical homeostasis	17	0.0251	0.0105913	WBGene00002045, WBGene00007016, WBGene00006698, WBGene00009617, WBGene00003053, WBGene00000381, WBGene00001465, WBGene00010266, WBGene00006373, WBGene00004735, WBGene00022201, WBGene00001840, WBGene00017640, WBGene00015916, WBGene00001398, WBGene00003963, WBGene00001500,	375	199	8801	2.00492	1	0.484398	16.7755
GOTERM_BP_ALL	GO:0050896~response to stimulus	83	0.1224	0.000456798	WBGene00017075, WBGene00003052, WBGene00000197, WBGene00004753, WBGene00013244, WBGene00001650, WBGene00006774, WBGene00004388, WBGene00002018, WBGene00020868, WBGene00015916, WBGene00000039, WBGene00003767, WBGene00002007, WBGene00010054, WBGene00002016, WBGene00002026, WBGene00009213, WBGene00001758, WBGene00001915, WBGene00006497, WBGene00011480, WBGene00006912, WBGene00016556, WBGene00002083,…	375	1361	8801	1.43127	0.608598	0.0751913	0.784865
GOTERM_BP_ALL	GO:0042221~response to chemical stimulus	17	0.0251	0.00038929	WBGene00007516, WBGene00003965, WBGene00011480, WBGene00000412, WBGene00020909, WBGene00002018, WBGene00006923, WBGene00003473, WBGene00002019, WBGene00003767, WBGene00002007, WBGene00003769, WBGene00002016, WBGene00002026, WBGene00001758, WBGene00002013, WBGene00013220,	375	144	8801	2.77069	0.550387	0.0700921	0.669239
GOTERM_BP_ALL	GO:0005991~trehalose metabolic process	3	0.0044	0.0531985	WBGene00006610, WBGene00006602, WBGene00006602,	375	9	8801	7.82311	1	0.841154	61.0445
GOTERM_BP_ALL	GO:0010038~response to metal ion	3	0.0044	0.04255	WBGene00006923, WBGene00003473, WBGene00000412,	375	8	8801	8.801	1	0.796903	52.7574
GOTERM_BP_ALL	GO:0006537~glutamate biosynthetic process	2	0.0029	0.0831891	WBGene00012326, WBGene00007197,	375	2	8801	23.4693	1	0.904268	77.6392
GOTERM_BP_ALL	GO:0010035~response to inorganic substance	3	0.0044	0.0646712	WBGene00006923, WBGene00003473, WBGene00000412,	375	10	8801	7.0408	1	0.867145	68.4311
GOTERM_BP_ALL	GO:0050878~regulation of body fluid levels	15	0.0221	0.012753	WBGene00002045, WBGene00007016, WBGene00018256, WBGene00006698, WBGene00003053, WBGene00000381, WBGene00001465, WBGene00010266, WBGene00006373, WBGene00004735, WBGene00022201, WBGene00001840, WBGene00015916, WBGene00001398, WBGene00003963,	375	169	8801	2.08308	1	0.528985	19.8563
GOTERM_BP_ALL	GO:0005984~disaccharide metabolic process	3	0.0044	0.0531985	WBGene00006610, WBGene00006602, WBGene00006602,	375	9	8801	7.82311	1	0.841154	61.0445

## Sheet: CELEGANS_GOTERMBP_2
Category	Term	Count	%	PValue	Genes	List Total	Pop Hits	Pop Total	Fold Enrichment	Bonferroni	Benjamini	FDR
GOTERM_BP_2	GO:0008340~determination of adult life span	30	0.0442	2.52022e-10	WBGene00000169, WBGene00007016, WBGene00000479, WBGene00015259, WBGene00009898, WBGene00004798, WBGene00000929, WBGene00003473, WBGene00000103, WBGene00009213, WBGene00002026, WBGene00002016, WBGene00001758, WBGene00001500, WBGene00001564, WBGene00010791, WBGene00000102, WBGene00019472, WBGene00010790, WBGene00004742, WBGene00010745, WBGene00000912, WBGene00004932, WBGene00002101, WBGene00001399,…	360	177	8475	3.99011	2.94866e-08	2.94866e-08	2.87978e-07
GOTERM_BP_2	GO:0006952~defense response	8	0.0118	0.0073472	WBGene00006923, WBGene00008591, WBGene00008199, WBGene00003767, WBGene00009213, WBGene00003769, WBGene00004758, WBGene00000912,	360	54	8475	3.48765	0.578019	0.0914145	8.08115
GOTERM_BP_2	GO:0006950~response to stress	24	0.0354	8.82872e-05	WBGene00007516, WBGene00018849, WBGene00011480, WBGene00018256, WBGene00013924, WBGene00013244, WBGene00002985, WBGene00002263, WBGene00020423, WBGene00004742, WBGene00001852, WBGene00000912, WBGene00004064, WBGene00002018, WBGene00003473, WBGene00010408, WBGene00002019, WBGene00002007, WBGene00002016, WBGene00002026, WBGene00001758, WBGene00002013, WBGene00000840, WBGene00013220,	360	227	8475	2.48899	0.0102769	0.00206388	0.100837
GOTERM_BP_2	GO:0048468~cell development	19	0.028	0.00841205	WBGene00002045, WBGene00006912, WBGene00003052, WBGene00019711, WBGene00001598, WBGene00017571, WBGene00000479, WBGene00000217, WBGene00000802, WBGene00006760, WBGene00000799, WBGene00015776, WBGene00001558, WBGene00017640, WBGene00000215, WBGene00004268, WBGene00004242, WBGene00004243, WBGene00000950,	360	229	8475	1.95324	0.627818	0.0941099	9.20159
GOTERM_BP_2	GO:0065008~regulation of biological quality	23	0.0339	0.0101569	WBGene00002045, WBGene00007016, WBGene00018256, WBGene00006698, WBGene00009617, WBGene00003053, WBGene00011495, WBGene00000381, WBGene00001465, WBGene00010266, WBGene00006373, WBGene00015510, WBGene00004735, WBGene00022201, WBGene00001840, WBGene00009805, WBGene00017640, WBGene00015916, WBGene00009804, WBGene00001398, WBGene00003963, WBGene00001500, WBGene00003964,	360	305	8475	1.77527	0.697124	0.102897	11.0106
GOTERM_BP_2	GO:0050878~regulation of body fluid levels	15	0.0221	0.0123976	WBGene00002045, WBGene00007016, WBGene00018256, WBGene00006698, WBGene00003053, WBGene00000381, WBGene00001465, WBGene00010266, WBGene00006373, WBGene00004735, WBGene00022201, WBGene00001840, WBGene00015916, WBGene00001398, WBGene00003963,	360	169	8475	2.0895	0.767666	0.114526	13.2854
GOTERM_BP_2	GO:0042221~response to chemical stimulus	17	0.0251	0.000373788	WBGene00007516, WBGene00003965, WBGene00011480, WBGene00000412, WBGene00020909, WBGene00002018, WBGene00006923, WBGene00003473, WBGene00002019, WBGene00003767, WBGene00002007, WBGene00003769, WBGene00002016, WBGene00002026, WBGene00001758, WBGene00002013, WBGene00013220,	360	144	8475	2.77922	0.0427985	0.00726372	0.426284
GOTERM_BP_2	GO:0019725~cellular homeostasis	8	0.0118	0.0680409	WBGene00009805, WBGene00017640, WBGene00009804, WBGene00011495, WBGene00003963, WBGene00001500, WBGene00003964, WBGene00015510,	360	85	8475	2.21569	0.999737	0.445061	55.3
GOTERM_BP_2	GO:0006807~nitrogen compound metabolic process	23	0.0339	2.8717e-05	WBGene00019730, WBGene00017440, WBGene00007508, WBGene00007509, WBGene00013516, WBGene00012326, WBGene00001523, WBGene00007425, WBGene00008842, WBGene00007472, WBGene00007473, WBGene00007466, WBGene00009628, WBGene00000465, WBGene00008458, WBGene00000197, WBGene00017429, WBGene00006936, WBGene00003074, WBGene00014095, WBGene00016294, WBGene00002983, WBGene00011938, WBGene00007197, WBGene00021355,…	360	197	8475	2.74852	0.00335429	0.000839631	0.0328091
GOTERM_BP_2	GO:0007568~aging	30	0.0442	2.52022e-10	WBGene00000169, WBGene00007016, WBGene00000479, WBGene00015259, WBGene00009898, WBGene00004798, WBGene00000929, WBGene00003473, WBGene00000103, WBGene00009213, WBGene00002026, WBGene00002016, WBGene00001758, WBGene00001500, WBGene00001564, WBGene00010791, WBGene00000102, WBGene00019472, WBGene00010790, WBGene00004742, WBGene00010745, WBGene00000912, WBGene00004932, WBGene00002101, WBGene00001399,…	360	177	8475	3.99011	2.94866e-08	2.94866e-08	2.87978e-07
GOTERM_BP_2	GO:0016265~death	14	0.0206	0.000728126	WBGene00002045, WBGene00006912, WBGene00019711, WBGene00000479, WBGene00000217, WBGene00000802, WBGene00006760, WBGene00000799, WBGene00015776, WBGene00001558, WBGene00000215, WBGene00004268, WBGene00017640, WBGene00000950,	360	110	8475	2.99621	0.0816914	0.0121007	0.828855
GOTERM_BP_2	GO:0009607~response to biotic stimulus	9	0.0133	0.00108137	WBGene00002018, WBGene00011480, WBGene00002019, WBGene00003767, WBGene00002007, WBGene00002026, WBGene00002016, WBGene00003769, WBGene00002013,	360	50	8475	4.2375	0.118904	0.0156991	1.22871
GOTERM_BP_2	GO:0006091~generation of precursor metabolites and energy	39	0.0575	7.63818e-07	WBGene00015400, WBGene00001476, WBGene00000373, WBGene00017565, WBGene00019565, WBGene00010707, WBGene00010083, WBGene00008565, WBGene00010705, WBGene00000229, WBGene00000041, WBGene00015043, WBGene00010052, WBGene00016061, WBGene00009805, WBGene00006610, WBGene00009804, WBGene00011676, WBGene00021355, WBGene00006917, WBGene00003778, WBGene00007536, WBGene00006912, WBGene00001564, WBGene00012326,…	360	384	8475	2.39095	8.93628e-05	2.97885e-05	0.000872787
GOTERM_BP_2	GO:0009058~biosynthetic process	42	0.0619	0.0162604	WBGene00019730, WBGene00010197, WBGene00008458, WBGene00000197, WBGene00001397, WBGene00017429, WBGene00008948, WBGene00000229, WBGene00018174, WBGene00003074, WBGene00004424, WBGene00005019, WBGene00000929, WBGene00004496, WBGene00020820, WBGene00020868, WBGene00004449, WBGene00006917, WBGene00019886, WBGene00006912, WBGene00012326, WBGene00001523, WBGene00002083, WBGene00009628, WBGene00017262,…	360	689	8475	1.43505	0.853115	0.137178	17.083

## Sheet: CBRIGGSAE_GOTERMBP_ALL
Category	Term	Count	%	PValue	Genes	List Total	Pop Hits	Pop Total	Fold Enrichment	Bonferroni	Benjamini	FDR
GOTERM_BP_ALL	GO:0043068~positive regulation of programmed cell death	3	0.0105	0.0578642	WBGene00017640, WBGene00000217, WBGene00000802,	158	22	8801	7.5958	1	0.945719	64.2259
GOTERM_BP_ALL	GO:0046356~acetyl-CoA catabolic process	3	0.0105	0.0401322	WBGene00001564, WBGene00018491, WBGene00000041,	158	18	8801	9.28376	1	0.950373	50.6573
GOTERM_BP_ALL	GO:0044262~cellular carbohydrate metabolic process	8	0.0279	0.00608094	WBGene00005019, WBGene00022199, WBGene00001564, WBGene00007425, WBGene00007466, WBGene00006610, WBGene00017262, WBGene00018491, WBGene00000041,	158	122	8801	3.65263	0.999996	0.591167	9.98468
GOTERM_BP_ALL	GO:0050896~response to stimulus	38	0.1324	0.00474321	WBGene00007516, WBGene00003485, WBGene00003052, WBGene00018256, WBGene00004753, WBGene00008948, WBGene00006774, WBGene00006373, WBGene00000041, WBGene00005019, WBGene00003473, WBGene00020868, WBGene00015916, WBGene00009213, WBGene00002026, WBGene00002007, WBGene00001758, WBGene00006739, WBGene00001915, WBGene00006497, WBGene00018849, WBGene00011480, WBGene00009617, WBGene00020909, WBGene00002263,…	158	1361	8801	1.55525	0.999942	0.556659	7.87232
GOTERM_BP_ALL	GO:0048878~chemical homeostasis	8	0.0279	0.0652227	WBGene00017640, WBGene00009617, WBGene00015916, WBGene00001398, WBGene00003963, WBGene00001465, WBGene00001500, WBGene00006373,	158	199	8801	2.2393	1	0.950718	68.7506
GOTERM_BP_ALL	GO:0044255~cellular lipid metabolic process	8	0.0279	0.0350607	WBGene00001399, WBGene00005019, WBGene00017262, WBGene00001397, WBGene00001398, WBGene00008565, WBGene00015889, WBGene00008832,	158	173	8801	2.57584	1	0.952782	45.963
GOTERM_BP_ALL	GO:0048869~cellular developmental process	12	0.0418	0.047485	WBGene00003052, WBGene00019711, WBGene00001558, WBGene00004268, WBGene00000215, WBGene00017640, WBGene00004242, WBGene00017571, WBGene00000217, WBGene00000802, WBGene00004243, WBGene00000950,	158	349	8801	1.91527	1	0.951519	56.7855
GOTERM_BP_ALL	GO:0044248~cellular catabolic process	9	0.0314	0.0280166	WBGene00022199, WBGene00013516, WBGene00001564, WBGene00007425, WBGene00007466, WBGene00018491, WBGene00021355, WBGene00008948, WBGene00013220, WBGene00000041,	158	202	8801	2.4818	1	0.945902	38.7413
GOTERM_BP_ALL	GO:0006950~response to stress	13	0.0453	0.000730603	WBGene00007516, WBGene00011480, WBGene00018849, WBGene00018256, WBGene00002263, WBGene00001852, WBGene00003473, WBGene00010408, WBGene00002007, WBGene00002026, WBGene00001758, WBGene00000840, WBGene00013220,	158	227	8801	3.19001	0.776976	0.312793	1.25253
GOTERM_BP_ALL	GO:0001676~long-chain fatty acid metabolic process	2	0.007	0.0353615	WBGene00001397, WBGene00001398,	158	2	8801	55.7025	1	0.941736	46.2528
GOTERM_BP_ALL	GO:0046903~secretion	5	0.0174	0.0720084	WBGene00009654, WBGene00004268, WBGene00004753, WBGene00001465, WBGene00006373,	158	88	8801	3.16492	1	0.956332	72.4404
GOTERM_BP_ALL	GO:0042221~response to chemical stimulus	8	0.0279	0.0144415	WBGene00007516, WBGene00011480, WBGene00003473, WBGene00020909, WBGene00002026, WBGene00002007, WBGene00001758, WBGene00013220,	158	144	8801	3.09459	1	0.809699	22.1877
GOTERM_BP_ALL	GO:0008219~cell death	8	0.0279	0.00344762	WBGene00019711, WBGene00001558, WBGene00004268, WBGene00000215, WBGene00017640, WBGene00000217, WBGene00000802, WBGene00000950,	158	110	8801	4.05109	0.999167	0.507873	5.78204
GOTERM_BP_ALL	GO:0009060~aerobic respiration	3	0.0105	0.0401322	WBGene00001564, WBGene00018491, WBGene00000041,	158	18	8801	9.28376	1	0.950373	50.6573
GOTERM_BP_ALL	GO:0009056~catabolic process	10	0.0348	0.0340221	WBGene00022199, WBGene00013516, WBGene00001564, WBGene00007425, WBGene00007466, WBGene00018491, WBGene00017316, WBGene00021355, WBGene00008948, WBGene00013220, WBGene00000041,	158	249	8801	2.23705	1	0.954484	44.9511
GOTERM_BP_ALL	GO:0006801~superoxide metabolic process	3	0.0105	0.00825076	WBGene00004931, WBGene00004932, WBGene00007036,	158	8	8801	20.8884	1	0.678236	13.3142
GOTERM_BP_ALL	GO:0007568~aging	16	0.0557	5.44907e-07	WBGene00000169, WBGene00001564, WBGene00010791, WBGene00000102, WBGene00019472, WBGene00010745, WBGene00004798, WBGene00004932, WBGene00001399, WBGene00003473, WBGene00000103, WBGene00016052, WBGene00002026, WBGene00009213, WBGene00001758, WBGene00001500,	158	177	8801	5.03526	0.00111807	0.000372829	0.000939728
GOTERM_BP_ALL	GO:0045333~cellular respiration	3	0.0105	0.0401322	WBGene00001564, WBGene00018491, WBGene00000041,	158	18	8801	9.28376	1	0.950373	50.6573
GOTERM_BP_ALL	GO:0006800~oxygen and reactive oxygen species metabolic process	4	0.0139	0.00108854	WBGene00004931, WBGene00004932, WBGene00013220, WBGene00007036,	158	12	8801	18.5675	0.893114	0.360583	1.86076
GOTERM_BP_ALL	GO:0042759~long-chain fatty acid biosynthetic process	2	0.007	0.0353615	WBGene00001397, WBGene00001398,	158	2	8801	55.7025	1	0.941736	46.2528
GOTERM_BP_ALL	GO:0051187~cofactor catabolic process	3	0.0105	0.048701	WBGene00001564, WBGene00018491, WBGene00000041,	158	20	8801	8.35538	1	0.946526	57.7271
GOTERM_BP_ALL	GO:0008202~steroid metabolic process	3	0.0105	0.0578642	WBGene00005019, WBGene00017262, WBGene00008832,	158	22	8801	7.5958	1	0.945719	64.2259
GOTERM_BP_ALL	GO:0051186~cofactor metabolic process	7	0.0244	0.0617289	WBGene00001564, WBGene00004068, WBGene00018491, WBGene00001758, WBGene00019886, WBGene00015889, WBGene00000041,	158	157	8801	2.48355	1	0.945354	66.674
GOTERM_BP_ALL	GO:0032787~monocarboxylic acid metabolic process	6	0.0209	0.00518275	WBGene00001399, WBGene00001564, WBGene00001397, WBGene00001398, WBGene00008565, WBGene00015889,	158	63	8801	5.305	0.999977	0.559834	8.57147
GOTERM_BP_ALL	GO:0032502~developmental process	74	0.2578	0.0560345	WBGene00003648, WBGene00003052, WBGene00003156, WBGene00004753, WBGene00013729, WBGene00006928, WBGene00004424, WBGene00000103, WBGene00020868, WBGene00004242, WBGene00015916, WBGene00008439, WBGene00009213, WBGene00002026, WBGene00002007, WBGene00001758, WBGene00006439, WBGene00001500, WBGene00001915, WBGene00006497, WBGene00011480, WBGene00001564, WBGene00010791, WBGene00019472, WBGene00000802,…	158	3520	8801	1.17102	1	0.948165	63.0086
GOTERM_BP_ALL	GO:0008152~metabolic process	92	0.3206	0.0497932	WBGene00003648, WBGene00013516, WBGene00003156, WBGene00001397, WBGene00008565, WBGene00000473, WBGene00015043, WBGene00004424, WBGene00004931, WBGene00000973, WBGene00000103, WBGene00006610, WBGene00002200, WBGene00020868, WBGene00008439, WBGene00002026, WBGene00002007, WBGene00021355, WBGene00001758, WBGene00018106, WBGene00001915, WBGene00011480, WBGene00001564, WBGene00007885, WBGene00016091,…	158	4501	8801	1.13855	1	0.932029	58.5564
GOTERM_BP_ALL	GO:0006118~electron transport	13	0.0453	0.00916055	WBGene00001476, WBGene00019472, WBGene00008565, WBGene00010083, WBGene00015040, WBGene00017874, WBGene00015043, WBGene00019471, WBGene00012031, WBGene00021355, WBGene00003778, WBGene00013220, WBGene00018210,	158	309	8801	2.34347	1	0.692976	14.6755
GOTERM_BP_ALL	GO:0006904~vesicle docking during exocytosis	3	0.0105	0.0250016	WBGene00009654, WBGene00004753, WBGene00006373,	158	14	8801	11.9363	1	0.93516	35.3803
GOTERM_BP_ALL	GO:0048278~vesicle docking	3	0.0105	0.028515	WBGene00009654, WBGene00004753, WBGene00006373,	158	15	8801	11.1405	1	0.940881	39.2807
GOTERM_BP_ALL	GO:0008610~lipid biosynthetic process	5	0.0174	0.0720084	WBGene00001399, WBGene00005019, WBGene00017262, WBGene00001397, WBGene00001398,	158	88	8801	3.16492	1	0.956332	72.4404
GOTERM_BP_ALL	GO:0007281~germ cell development	4	0.0139	0.0593851	WBGene00003052, WBGene00004242, WBGene00017571, WBGene00004243,	158	50	8801	4.4562	1	0.942533	65.2089
GOTERM_BP_ALL	GO:0022406~membrane docking	3	0.0105	0.028515	WBGene00009654, WBGene00004753, WBGene00006373,	158	15	8801	11.1405	1	0.940881	39.2807
GOTERM_BP_ALL	GO:0006099~tricarboxylic acid cycle	3	0.0105	0.0401322	WBGene00001564, WBGene00018491, WBGene00000041,	158	18	8801	9.28376	1	0.950373	50.6573
GOTERM_BP_ALL	GO:0065009~regulation of a molecular function	4	0.0139	0.0811485	WBGene00020398, WBGene00001558, WBGene00001558, WBGene00017640,	158	57	8801	3.90895	1	0.962306	76.7652
GOTERM_BP_ALL	GO:0006633~fatty acid biosynthetic process	3	0.0105	0.048701	WBGene00001399, WBGene00001397, WBGene00001398,	158	20	8801	8.35538	1	0.946526	57.7271
GOTERM_BP_ALL	GO:0006631~fatty acid metabolic process	5	0.0174	0.00958477	WBGene00001399, WBGene00001397, WBGene00001398, WBGene00008565, WBGene00015889,	158	47	8801	5.9258	1	0.687479	15.3033
GOTERM_BP_ALL	GO:0006091~generation of precursor metabolites and energy	17	0.0592	0.00133372	WBGene00001476, WBGene00001564, WBGene00019472, WBGene00018491, WBGene00010083, WBGene00008565, WBGene00015040, WBGene00000041, WBGene00017874, WBGene00015043, WBGene00019471, WBGene00006610, WBGene00012031, WBGene00021355, WBGene00003778, WBGene00013220, WBGene00018210,	158	384	8801	2.466	0.935427	0.366604	2.27534
GOTERM_BP_ALL	GO:0006887~exocytosis	3	0.0105	0.0994594	WBGene00009654, WBGene00004753, WBGene00006373,	158	30	8801	5.57025	1	0.978519	83.5799
GOTERM_BP_ALL	GO:0005975~carbohydrate metabolic process	9	0.0314	0.0785227	WBGene00005019, WBGene00022199, WBGene00001564, WBGene00007425, WBGene00007466, WBGene00006610, WBGene00017262, WBGene00018491, WBGene00008948, WBGene00000041,	158	250	8801	2.00529	1	0.960388	75.5931
GOTERM_BP_ALL	GO:0050801~ion homeostasis	3	0.0105	0.0777677	WBGene00017640, WBGene00009617, WBGene00001500,	158	26	8801	6.42722	1	0.961572	75.2459
GOTERM_BP_ALL	GO:0006084~acetyl-CoA metabolic process	3	0.0105	0.0578642	WBGene00001564, WBGene00018491, WBGene00000041,	158	22	8801	7.5958	1	0.945719	64.2259
GOTERM_BP_ALL	GO:0009109~coenzyme catabolic process	3	0.0105	0.048701	WBGene00001564, WBGene00018491, WBGene00000041,	158	20	8801	8.35538	1	0.946526	57.7271
GOTERM_BP_ALL	GO:0006082~organic acid metabolic process	12	0.0418	0.00203801	WBGene00001399, WBGene00016294, WBGene00013516, WBGene00001564, WBGene00009628, WBGene00001397, WBGene00018491, WBGene00001398, WBGene00021355, WBGene00008565, WBGene00015889, WBGene00014095,	158	222	8801	3.01095	0.984828	0.45027	3.45711
GOTERM_BP_ALL	GO:0006732~coenzyme metabolic process	6	0.0209	0.0706566	WBGene00001564, WBGene00004068, WBGene00018491, WBGene00001758, WBGene00015889, WBGene00000041,	158	124	8801	2.69528	1	0.95927	71.7397
GOTERM_BP_ALL	GO:0030154~cell differentiation	12	0.0418	0.045891	WBGene00003052, WBGene00019711, WBGene00001558, WBGene00004268, WBGene00000215, WBGene00017640, WBGene00004242, WBGene00017571, WBGene00000217, WBGene00000802, WBGene00004243, WBGene00000950,	158	347	8801	1.92631	1	0.9509	55.5212
GOTERM_BP_ALL	GO:0010259~multicellular organismal aging	16	0.0557	5.44907e-07	WBGene00000169, WBGene00001564, WBGene00010791, WBGene00000102, WBGene00019472, WBGene00010745, WBGene00004798, WBGene00004932, WBGene00001399, WBGene00003473, WBGene00000103, WBGene00016052, WBGene00002026, WBGene00009213, WBGene00001758, WBGene00001500,	158	177	8801	5.03526	0.00111807	0.000372829	0.000939728
GOTERM_BP_ALL	GO:0050790~regulation of catalytic activity	4	0.0139	0.0746166	WBGene00020398, WBGene00001558, WBGene00001558, WBGene00017640,	158	55	8801	4.05109	1	0.958584	73.7461
GOTERM_BP_ALL	GO:0046394~carboxylic acid biosynthetic process	3	0.0105	0.048701	WBGene00001399, WBGene00001397, WBGene00001398,	158	20	8801	8.35538	1	0.946526	57.7271
GOTERM_BP_ALL	GO:0048468~cell development	12	0.0418	0.00259804	WBGene00003052, WBGene00019711, WBGene00001558, WBGene00004268, WBGene00000215, WBGene00017640, WBGene00004242, WBGene00017571, WBGene00000217, WBGene00000802, WBGene00004243, WBGene00000950,	158	229	8801	2.91891	0.995208	0.447562	4.3872
GOTERM_BP_ALL	GO:0006869~lipid transport	3	0.0105	0.0360878	WBGene00006925, WBGene00006928, WBGene00008832,	158	17	8801	9.82986	1	0.93887	46.9464
GOTERM_BP_ALL	GO:0006508~proteolysis	13	0.0453	0.0915471	WBGene00018849, WBGene00018256, WBGene00008948, WBGene00000217, WBGene00000788, WBGene00003957, WBGene00017969, WBGene00000215, WBGene00008439, WBGene00004003, WBGene00006739, WBGene00018106, WBGene00003524,	158	438	8801	1.65327	1	0.972232	80.9061
GOTERM_BP_ALL	GO:0016053~organic acid biosynthetic process	3	0.0105	0.048701	WBGene00001399, WBGene00001397, WBGene00001398,	158	20	8801	8.35538	1	0.946526	57.7271
GOTERM_BP_ALL	GO:0016265~death	8	0.0279	0.00344762	WBGene00019711, WBGene00001558, WBGene00004268, WBGene00000215, WBGene00017640, WBGene00000217, WBGene00000802, WBGene00000950,	158	110	8801	4.05109	0.999167	0.507873	5.78204
GOTERM_BP_ALL	GO:0019752~carboxylic acid metabolic process	12	0.0418	0.00203801	WBGene00001399, WBGene00016294, WBGene00013516, WBGene00001564, WBGene00009628, WBGene00001397, WBGene00018491, WBGene00001398, WBGene00021355, WBGene00008565, WBGene00015889, WBGene00014095,	158	222	8801	3.01095	0.984828	0.45027	3.45711
GOTERM_BP_ALL	GO:0006979~response to oxidative stress	3	0.0105	0.0884123	WBGene00007516, WBGene00001758, WBGene00013220,	158	28	8801	5.96813	1	0.970379	79.7374
GOTERM_BP_ALL	GO:0008340~determination of adult life span	16	0.0557	5.44907e-07	WBGene00000169, WBGene00001564, WBGene00010791, WBGene00000102, WBGene00019472, WBGene00010745, WBGene00004798, WBGene00004932, WBGene00001399, WBGene00003473, WBGene00000103, WBGene00016052, WBGene00002026, WBGene00009213, WBGene00001758, WBGene00001500,	158	177	8801	5.03526	0.00111807	0.000372829	0.000939728

## Sheet: CBRIGGSAE_GOTERMBP_2
Category	Term	Count	%	PValue	Genes	List Total	Pop Hits	Pop Total	Fold Enrichment	Bonferroni	Benjamini	FDR
GOTERM_BP_ALL	GO:0043068~positive regulation of programmed cell death	3	0.0105	0.0578642	WBGene00017640, WBGene00000217, WBGene00000802,	158	22	8801	7.5958	1	0.945719	64.2259
GOTERM_BP_ALL	GO:0046356~acetyl-CoA catabolic process	3	0.0105	0.0401322	WBGene00001564, WBGene00018491, WBGene00000041,	158	18	8801	9.28376	1	0.950373	50.6573
GOTERM_BP_ALL	GO:0044262~cellular carbohydrate metabolic process	8	0.0279	0.00608094	WBGene00005019, WBGene00022199, WBGene00001564, WBGene00007425, WBGene00007466, WBGene00006610, WBGene00017262, WBGene00018491, WBGene00000041,	158	122	8801	3.65263	0.999996	0.591167	9.98468
GOTERM_BP_ALL	GO:0050896~response to stimulus	38	0.1324	0.00474321	WBGene00007516, WBGene00003485, WBGene00003052, WBGene00018256, WBGene00004753, WBGene00008948, WBGene00006774, WBGene00006373, WBGene00000041, WBGene00005019, WBGene00003473, WBGene00020868, WBGene00015916, WBGene00009213, WBGene00002026, WBGene00002007, WBGene00001758, WBGene00006739, WBGene00001915, WBGene00006497, WBGene00018849, WBGene00011480, WBGene00009617, WBGene00020909, WBGene00002263,…	158	1361	8801	1.55525	0.999942	0.556659	7.87232
GOTERM_BP_ALL	GO:0048878~chemical homeostasis	8	0.0279	0.0652227	WBGene00017640, WBGene00009617, WBGene00015916, WBGene00001398, WBGene00003963, WBGene00001465, WBGene00001500, WBGene00006373,	158	199	8801	2.2393	1	0.950718	68.7506
GOTERM_BP_ALL	GO:0044255~cellular lipid metabolic process	8	0.0279	0.0350607	WBGene00001399, WBGene00005019, WBGene00017262, WBGene00001397, WBGene00001398, WBGene00008565, WBGene00015889, WBGene00008832,	158	173	8801	2.57584	1	0.952782	45.963
GOTERM_BP_ALL	GO:0048869~cellular developmental process	12	0.0418	0.047485	WBGene00003052, WBGene00019711, WBGene00001558, WBGene00004268, WBGene00000215, WBGene00017640, WBGene00004242, WBGene00017571, WBGene00000217, WBGene00000802, WBGene00004243, WBGene00000950,	158	349	8801	1.91527	1	0.951519	56.7855
GOTERM_BP_ALL	GO:0044248~cellular catabolic process	9	0.0314	0.0280166	WBGene00022199, WBGene00013516, WBGene00001564, WBGene00007425, WBGene00007466, WBGene00018491, WBGene00021355, WBGene00008948, WBGene00013220, WBGene00000041,	158	202	8801	2.4818	1	0.945902	38.7413
GOTERM_BP_ALL	GO:0006950~response to stress	13	0.0453	0.000730603	WBGene00007516, WBGene00011480, WBGene00018849, WBGene00018256, WBGene00002263, WBGene00001852, WBGene00003473, WBGene00010408, WBGene00002007, WBGene00002026, WBGene00001758, WBGene00000840, WBGene00013220,	158	227	8801	3.19001	0.776976	0.312793	1.25253
GOTERM_BP_ALL	GO:0001676~long-chain fatty acid metabolic process	2	0.007	0.0353615	WBGene00001397, WBGene00001398,	158	2	8801	55.7025	1	0.941736	46.2528
GOTERM_BP_ALL	GO:0046903~secretion	5	0.0174	0.0720084	WBGene00009654, WBGene00004268, WBGene00004753, WBGene00001465, WBGene00006373,	158	88	8801	3.16492	1	0.956332	72.4404
GOTERM_BP_ALL	GO:0042221~response to chemical stimulus	8	0.0279	0.0144415	WBGene00007516, WBGene00011480, WBGene00003473, WBGene00020909, WBGene00002026, WBGene00002007, WBGene00001758, WBGene00013220,	158	144	8801	3.09459	1	0.809699	22.1877
GOTERM_BP_ALL	GO:0008219~cell death	8	0.0279	0.00344762	WBGene00019711, WBGene00001558, WBGene00004268, WBGene00000215, WBGene00017640, WBGene00000217, WBGene00000802, WBGene00000950,	158	110	8801	4.05109	0.999167	0.507873	5.78204
GOTERM_BP_ALL	GO:0009060~aerobic respiration	3	0.0105	0.0401322	WBGene00001564, WBGene00018491, WBGene00000041,	158	18	8801	9.28376	1	0.950373	50.6573
GOTERM_BP_ALL	GO:0009056~catabolic process	10	0.0348	0.0340221	WBGene00022199, WBGene00013516, WBGene00001564, WBGene00007425, WBGene00007466, WBGene00018491, WBGene00017316, WBGene00021355, WBGene00008948, WBGene00013220, WBGene00000041,	158	249	8801	2.23705	1	0.954484	44.9511
GOTERM_BP_ALL	GO:0006801~superoxide metabolic process	3	0.0105	0.00825076	WBGene00004931, WBGene00004932, WBGene00007036,	158	8	8801	20.8884	1	0.678236	13.3142
GOTERM_BP_ALL	GO:0007568~aging	16	0.0557	5.44907e-07	WBGene00000169, WBGene00001564, WBGene00010791, WBGene00000102, WBGene00019472, WBGene00010745, WBGene00004798, WBGene00004932, WBGene00001399, WBGene00003473, WBGene00000103, WBGene00016052, WBGene00002026, WBGene00009213, WBGene00001758, WBGene00001500,	158	177	8801	5.03526	0.00111807	0.000372829	0.000939728
GOTERM_BP_ALL	GO:0045333~cellular respiration	3	0.0105	0.0401322	WBGene00001564, WBGene00018491, WBGene00000041,	158	18	8801	9.28376	1	0.950373	50.6573
GOTERM_BP_ALL	GO:0006800~oxygen and reactive oxygen species metabolic process	4	0.0139	0.00108854	WBGene00004931, WBGene00004932, WBGene00013220, WBGene00007036,	158	12	8801	18.5675	0.893114	0.360583	1.86076
GOTERM_BP_ALL	GO:0042759~long-chain fatty acid biosynthetic process	2	0.007	0.0353615	WBGene00001397, WBGene00001398,	158	2	8801	55.7025	1	0.941736	46.2528
GOTERM_BP_ALL	GO:0051187~cofactor catabolic process	3	0.0105	0.048701	WBGene00001564, WBGene00018491, WBGene00000041,	158	20	8801	8.35538	1	0.946526	57.7271
GOTERM_BP_ALL	GO:0008202~steroid metabolic process	3	0.0105	0.0578642	WBGene00005019, WBGene00017262, WBGene00008832,	158	22	8801	7.5958	1	0.945719	64.2259
GOTERM_BP_ALL	GO:0051186~cofactor metabolic process	7	0.0244	0.0617289	WBGene00001564, WBGene00004068, WBGene00018491, WBGene00001758, WBGene00019886, WBGene00015889, WBGene00000041,	158	157	8801	2.48355	1	0.945354	66.674
GOTERM_BP_ALL	GO:0032787~monocarboxylic acid metabolic process	6	0.0209	0.00518275	WBGene00001399, WBGene00001564, WBGene00001397, WBGene00001398, WBGene00008565, WBGene00015889,	158	63	8801	5.305	0.999977	0.559834	8.57147
GOTERM_BP_ALL	GO:0032502~developmental process	74	0.2578	0.0560345	WBGene00003648, WBGene00003052, WBGene00003156, WBGene00004753, WBGene00013729, WBGene00006928, WBGene00004424, WBGene00000103, WBGene00020868, WBGene00004242, WBGene00015916, WBGene00008439, WBGene00009213, WBGene00002026, WBGene00002007, WBGene00001758, WBGene00006439, WBGene00001500, WBGene00001915, WBGene00006497, WBGene00011480, WBGene00001564, WBGene00010791, WBGene00019472, WBGene00000802,…	158	3520	8801	1.17102	1	0.948165	63.0086
GOTERM_BP_ALL	GO:0008152~metabolic process	92	0.3206	0.0497932	WBGene00003648, WBGene00013516, WBGene00003156, WBGene00001397, WBGene00008565, WBGene00000473, WBGene00015043, WBGene00004424, WBGene00004931, WBGene00000973, WBGene00000103, WBGene00006610, WBGene00002200, WBGene00020868, WBGene00008439, WBGene00002026, WBGene00002007, WBGene00021355, WBGene00001758, WBGene00018106, WBGene00001915, WBGene00011480, WBGene00001564, WBGene00007885, WBGene00016091,…	158	4501	8801	1.13855	1	0.932029	58.5564
GOTERM_BP_ALL	GO:0006118~electron transport	13	0.0453	0.00916055	WBGene00001476, WBGene00019472, WBGene00008565, WBGene00010083, WBGene00015040, WBGene00017874, WBGene00015043, WBGene00019471, WBGene00012031, WBGene00021355, WBGene00003778, WBGene00013220, WBGene00018210,	158	309	8801	2.34347	1	0.692976	14.6755
GOTERM_BP_ALL	GO:0006904~vesicle docking during exocytosis	3	0.0105	0.0250016	WBGene00009654, WBGene00004753, WBGene00006373,	158	14	8801	11.9363	1	0.93516	35.3803
GOTERM_BP_ALL	GO:0048278~vesicle docking	3	0.0105	0.028515	WBGene00009654, WBGene00004753, WBGene00006373,	158	15	8801	11.1405	1	0.940881	39.2807
GOTERM_BP_ALL	GO:0008610~lipid biosynthetic process	5	0.0174	0.0720084	WBGene00001399, WBGene00005019, WBGene00017262, WBGene00001397, WBGene00001398,	158	88	8801	3.16492	1	0.956332	72.4404
GOTERM_BP_ALL	GO:0007281~germ cell development	4	0.0139	0.0593851	WBGene00003052, WBGene00004242, WBGene00017571, WBGene00004243,	158	50	8801	4.4562	1	0.942533	65.2089
GOTERM_BP_ALL	GO:0022406~membrane docking	3	0.0105	0.028515	WBGene00009654, WBGene00004753, WBGene00006373,	158	15	8801	11.1405	1	0.940881	39.2807
GOTERM_BP_ALL	GO:0006099~tricarboxylic acid cycle	3	0.0105	0.0401322	WBGene00001564, WBGene00018491, WBGene00000041,	158	18	8801	9.28376	1	0.950373	50.6573
GOTERM_BP_ALL	GO:0065009~regulation of a molecular function	4	0.0139	0.0811485	WBGene00020398, WBGene00001558, WBGene00001558, WBGene00017640,	158	57	8801	3.90895	1	0.962306	76.7652
GOTERM_BP_ALL	GO:0006633~fatty acid biosynthetic process	3	0.0105	0.048701	WBGene00001399, WBGene00001397, WBGene00001398,	158	20	8801	8.35538	1	0.946526	57.7271
GOTERM_BP_ALL	GO:0006631~fatty acid metabolic process	5	0.0174	0.00958477	WBGene00001399, WBGene00001397, WBGene00001398, WBGene00008565, WBGene00015889,	158	47	8801	5.9258	1	0.687479	15.3033
GOTERM_BP_ALL	GO:0006091~generation of precursor metabolites and energy	17	0.0592	0.00133372	WBGene00001476, WBGene00001564, WBGene00019472, WBGene00018491, WBGene00010083, WBGene00008565, WBGene00015040, WBGene00000041, WBGene00017874, WBGene00015043, WBGene00019471, WBGene00006610, WBGene00012031, WBGene00021355, WBGene00003778, WBGene00013220, WBGene00018210,	158	384	8801	2.466	0.935427	0.366604	2.27534
GOTERM_BP_ALL	GO:0006887~exocytosis	3	0.0105	0.0994594	WBGene00009654, WBGene00004753, WBGene00006373,	158	30	8801	5.57025	1	0.978519	83.5799
GOTERM_BP_ALL	GO:0005975~carbohydrate metabolic process	9	0.0314	0.0785227	WBGene00005019, WBGene00022199, WBGene00001564, WBGene00007425, WBGene00007466, WBGene00006610, WBGene00017262, WBGene00018491, WBGene00008948, WBGene00000041,	158	250	8801	2.00529	1	0.960388	75.5931
GOTERM_BP_ALL	GO:0050801~ion homeostasis	3	0.0105	0.0777677	WBGene00017640, WBGene00009617, WBGene00001500,	158	26	8801	6.42722	1	0.961572	75.2459
GOTERM_BP_ALL	GO:0006084~acetyl-CoA metabolic process	3	0.0105	0.0578642	WBGene00001564, WBGene00018491, WBGene00000041,	158	22	8801	7.5958	1	0.945719	64.2259
GOTERM_BP_ALL	GO:0009109~coenzyme catabolic process	3	0.0105	0.048701	WBGene00001564, WBGene00018491, WBGene00000041,	158	20	8801	8.35538	1	0.946526	57.7271
GOTERM_BP_ALL	GO:0006082~organic acid metabolic process	12	0.0418	0.00203801	WBGene00001399, WBGene00016294, WBGene00013516, WBGene00001564, WBGene00009628, WBGene00001397, WBGene00018491, WBGene00001398, WBGene00021355, WBGene00008565, WBGene00015889, WBGene00014095,	158	222	8801	3.01095	0.984828	0.45027	3.45711
GOTERM_BP_ALL	GO:0006732~coenzyme metabolic process	6	0.0209	0.0706566	WBGene00001564, WBGene00004068, WBGene00018491, WBGene00001758, WBGene00015889, WBGene00000041,	158	124	8801	2.69528	1	0.95927	71.7397
GOTERM_BP_ALL	GO:0030154~cell differentiation	12	0.0418	0.045891	WBGene00003052, WBGene00019711, WBGene00001558, WBGene00004268, WBGene00000215, WBGene00017640, WBGene00004242, WBGene00017571, WBGene00000217, WBGene00000802, WBGene00004243, WBGene00000950,	158	347	8801	1.92631	1	0.9509	55.5212
GOTERM_BP_ALL	GO:0010259~multicellular organismal aging	16	0.0557	5.44907e-07	WBGene00000169, WBGene00001564, WBGene00010791, WBGene00000102, WBGene00019472, WBGene00010745, WBGene00004798, WBGene00004932, WBGene00001399, WBGene00003473, WBGene00000103, WBGene00016052, WBGene00002026, WBGene00009213, WBGene00001758, WBGene00001500,	158	177	8801	5.03526	0.00111807	0.000372829	0.000939728
GOTERM_BP_ALL	GO:0050790~regulation of catalytic activity	4	0.0139	0.0746166	WBGene00020398, WBGene00001558, WBGene00001558, WBGene00017640,	158	55	8801	4.05109	1	0.958584	73.7461
GOTERM_BP_ALL	GO:0046394~carboxylic acid biosynthetic process	3	0.0105	0.048701	WBGene00001399, WBGene00001397, WBGene00001398,	158	20	8801	8.35538	1	0.946526	57.7271
GOTERM_BP_ALL	GO:0048468~cell development	12	0.0418	0.00259804	WBGene00003052, WBGene00019711, WBGene00001558, WBGene00004268, WBGene00000215, WBGene00017640, WBGene00004242, WBGene00017571, WBGene00000217, WBGene00000802, WBGene00004243, WBGene00000950,	158	229	8801	2.91891	0.995208	0.447562	4.3872
GOTERM_BP_ALL	GO:0006869~lipid transport	3	0.0105	0.0360878	WBGene00006925, WBGene00006928, WBGene00008832,	158	17	8801	9.82986	1	0.93887	46.9464
GOTERM_BP_ALL	GO:0006508~proteolysis	13	0.0453	0.0915471	WBGene00018849, WBGene00018256, WBGene00008948, WBGene00000217, WBGene00000788, WBGene00003957, WBGene00017969, WBGene00000215, WBGene00008439, WBGene00004003, WBGene00006739, WBGene00018106, WBGene00003524,	158	438	8801	1.65327	1	0.972232	80.9061
GOTERM_BP_ALL	GO:0016053~organic acid biosynthetic process	3	0.0105	0.048701	WBGene00001399, WBGene00001397, WBGene00001398,	158	20	8801	8.35538	1	0.946526	57.7271
GOTERM_BP_ALL	GO:0016265~death	8	0.0279	0.00344762	WBGene00019711, WBGene00001558, WBGene00004268, WBGene00000215, WBGene00017640, WBGene00000217, WBGene00000802, WBGene00000950,	158	110	8801	4.05109	0.999167	0.507873	5.78204
GOTERM_BP_ALL	GO:0019752~carboxylic acid metabolic process	12	0.0418	0.00203801	WBGene00001399, WBGene00016294, WBGene00013516, WBGene00001564, WBGene00009628, WBGene00001397, WBGene00018491, WBGene00001398, WBGene00021355, WBGene00008565, WBGene00015889, WBGene00014095,	158	222	8801	3.01095	0.984828	0.45027	3.45711
GOTERM_BP_ALL	GO:0006979~response to oxidative stress	3	0.0105	0.0884123	WBGene00007516, WBGene00001758, WBGene00013220,	158	28	8801	5.96813	1	0.970379	79.7374
GOTERM_BP_ALL	GO:0008340~determination of adult life span	16	0.0557	5.44907e-07	WBGene00000169, WBGene00001564, WBGene00010791, WBGene00000102, WBGene00019472, WBGene00010745, WBGene00004798, WBGene00004932, WBGene00001399, WBGene00003473, WBGene00000103, WBGene00016052, WBGene00002026, WBGene00009213, WBGene00001758, WBGene00001500,	158	177	8801	5.03526	0.00111807	0.000372829	0.000939728

## Sheet: CREMANEI_GOTERMBP_ALL
Category	Term	Count	%	PValue	Genes	List Total	Pop Hits	Pop Total	Fold Enrichment	Bonferroni	Benjamini	FDR
GOTERM_BP_ALL	GO:0019725~cellular homeostasis	6	0.0217	0.0144304	WBGene00009805, WBGene00017640, WBGene00009804, WBGene00011495, WBGene00003963, WBGene00001500,	150	85	8801	4.14165	1	0.726773	22.1725
GOTERM_BP_ALL	GO:0046356~acetyl-CoA catabolic process	3	0.0109	0.0364825	WBGene00001564, WBGene00018491, WBGene00000041,	150	18	8801	9.77889	1	0.914673	47.3198
GOTERM_BP_ALL	GO:0044262~cellular carbohydrate metabolic process	8	0.029	0.00458199	WBGene00005019, WBGene00022199, WBGene00001564, WBGene00002983, WBGene00008842, WBGene00006610, WBGene00018491, WBGene00000041,	150	122	8801	3.84743	0.99992	0.649223	7.6146
GOTERM_BP_ALL	GO:0009308~amine metabolic process	9	0.0326	0.0152816	WBGene00007509, WBGene00007508, WBGene00013516, WBGene00012326, WBGene00002983, WBGene00008842, WBGene00021355, WBGene00001993, WBGene00006936, WBGene00018282,	150	190	8801	2.77926	1	0.703579	23.3236
GOTERM_BP_ALL	GO:0050896~response to stimulus	35	0.1268	0.0109555	WBGene00007516, WBGene00003052, WBGene00008591, WBGene00013244, WBGene00004753, WBGene00008948, WBGene00000229, WBGene00001650, WBGene00004388, WBGene00000041, WBGene00005019, WBGene00002018, WBGene00003473, WBGene00015916, WBGene00009213, WBGene00002007, WBGene00001758, WBGene00002045, WBGene00011276, WBGene00016556, WBGene00009617, WBGene00020909, WBGene00013924, WBGene00002263, WBGene00004742,…	150	1361	8801	1.50887	1	0.756705	17.3022
GOTERM_BP_ALL	GO:0048878~chemical homeostasis	9	0.0326	0.0196441	WBGene00004735, WBGene00002045, WBGene00001840, WBGene00017640, WBGene00009617, WBGene00015916, WBGene00003963, WBGene00001465, WBGene00001500,	150	199	8801	2.65357	1	0.766523	28.9758
GOTERM_BP_ALL	GO:0009628~response to abiotic stimulus	4	0.0145	0.0874243	WBGene00003473, WBGene00004742, WBGene00001758, WBGene00000912,	150	62	8801	3.78538	1	0.984605	79.3553
GOTERM_BP_ALL	GO:0042592~homeostatic process	12	0.0435	0.00588969	WBGene00004735, WBGene00002045, WBGene00009805, WBGene00001840, WBGene00017640, WBGene00009617, WBGene00015916, WBGene00009804, WBGene00011495, WBGene00003963, WBGene00001465, WBGene00001500,	150	269	8801	2.6174	0.999995	0.636002	9.6855
GOTERM_BP_ALL	GO:0044248~cellular catabolic process	10	0.0362	0.00726166	WBGene00022199, WBGene00013516, WBGene00001564, WBGene00008842, WBGene00018491, WBGene00021355, WBGene00001993, WBGene00008948, WBGene00018282, WBGene00000041,	150	202	8801	2.90462	1	0.68367	11.8111
GOTERM_BP_ALL	GO:0006952~defense response	5	0.0181	0.0129592	WBGene00006923, WBGene00008591, WBGene00009213, WBGene00004758, WBGene00000912,	150	54	8801	5.43272	1	0.720623	20.1445
GOTERM_BP_ALL	GO:0006950~response to stress	13	0.0471	0.000456414	WBGene00007516, WBGene00013924, WBGene00013244, WBGene00002263, WBGene00004742, WBGene00001852, WBGene00004064, WBGene00000912, WBGene00002018, WBGene00003473, WBGene00002019, WBGene00002007, WBGene00001758,	150	227	8801	3.36015	0.608289	0.208882	0.784207
GOTERM_BP_ALL	GO:0009063~amino acid catabolic process	4	0.0145	0.00929511	WBGene00013516, WBGene00021355, WBGene00001993, WBGene00018282,	150	26	8801	9.02667	1	0.74575	14.8751
GOTERM_BP_ALL	GO:0042221~response to chemical stimulus	8	0.029	0.0110639	WBGene00007516, WBGene00006923, WBGene00002018, WBGene00003473, WBGene00002019, WBGene00020909, WBGene00002007, WBGene00001758,	150	144	8801	3.25963	1	0.739088	17.4584
GOTERM_BP_ALL	GO:0009060~aerobic respiration	3	0.0109	0.0364825	WBGene00001564, WBGene00018491, WBGene00000041,	150	18	8801	9.77889	1	0.914673	47.3198
GOTERM_BP_ALL	GO:0006810~transport	33	0.1196	0.0905649	WBGene00019803, WBGene00000169, WBGene00016970, WBGene00001558, WBGene00004753, WBGene00009666, WBGene00015381, WBGene00000229, WBGene00022808, WBGene00006928, WBGene00000176, WBGene00011596, WBGene00008084, WBGene00009805, WBGene00009804, WBGene00021355, WBGene00004003, WBGene00014030, WBGene00003778, WBGene00001500, WBGene00000170, WBGene00004062, WBGene00017220, WBGene00009617, WBGene00006925,…	150	1497	8801	1.2934	1	0.985547	80.5469
GOTERM_BP_ALL	GO:0009056~catabolic process	11	0.0399	0.0096118	WBGene00022199, WBGene00013516, WBGene00001564, WBGene00008842, WBGene00018491, WBGene00017316, WBGene00021355, WBGene00001993, WBGene00008948, WBGene00018282, WBGene00000041,	150	249	8801	2.59199	1	0.733371	15.3431
GOTERM_BP_ALL	GO:0006807~nitrogen compound metabolic process	11	0.0399	0.00184995	WBGene00007509, WBGene00007508, WBGene00017440, WBGene00013516, WBGene00012326, WBGene00002983, WBGene00008842, WBGene00017429, WBGene00021355, WBGene00001993, WBGene00006936, WBGene00018282,	150	197	8801	3.27618	0.977662	0.532471	3.14288
GOTERM_BP_ALL	GO:0009266~response to temperature stimulus	3	0.0109	0.0571201	WBGene00003473, WBGene00004742, WBGene00000912,	150	23	8801	7.65304	1	0.951138	63.7355
GOTERM_BP_ALL	GO:0007568~aging	18	0.0652	6.36583e-09	WBGene00000169, WBGene00001564, WBGene00010791, WBGene00000102, WBGene00004742, WBGene00015259, WBGene00009898, WBGene00010745, WBGene00000912, WBGene00004798, WBGene00003473, WBGene00001840, WBGene00002019, WBGene00016052, WBGene00009213, WBGene00001758, WBGene00001500, WBGene00016716,	150	177	8801	5.96678	1.3069e-05	4.35634e-06	1.09783e-05
GOTERM_BP_ALL	GO:0045333~cellular respiration	3	0.0109	0.0364825	WBGene00001564, WBGene00018491, WBGene00000041,	150	18	8801	9.77889	1	0.914673	47.3198
GOTERM_BP_ALL	GO:0051187~cofactor catabolic process	3	0.0109	0.0443238	WBGene00001564, WBGene00018491, WBGene00000041,	150	20	8801	8.801	1	0.930002	54.2443
GOTERM_BP_ALL	GO:0051186~cofactor metabolic process	9	0.0326	0.00511551	WBGene00001564, WBGene00004068, WBGene00018491, WBGene00001758, WBGene00003154, WBGene00019886, WBGene00000229, WBGene00015889, WBGene00000041,	150	157	8801	3.36344	0.999973	0.651079	8.46484
GOTERM_BP_ALL	GO:0006118~electron transport	10	0.0362	0.0788179	WBGene00007536, WBGene00012326, WBGene00009805, WBGene00009804, WBGene00011495, WBGene00021355, WBGene00010705, WBGene00003778, WBGene00018210, WBGene00015043,	150	309	8801	1.89881	1	0.978303	75.7276
GOTERM_BP_ALL	GO:0006099~tricarboxylic acid cycle	3	0.0109	0.0364825	WBGene00001564, WBGene00018491, WBGene00000041,	150	18	8801	9.77889	1	0.914673	47.3198
GOTERM_BP_ALL	GO:0065009~regulation of a molecular function	4	0.0145	0.0717988	WBGene00006923, WBGene00001558, WBGene00001558, WBGene00017640,	150	57	8801	4.11743	1	0.971483	72.3328
GOTERM_BP_ALL	GO:0065008~regulation of biological quality	12	0.0435	0.0143455	WBGene00004735, WBGene00002045, WBGene00009805, WBGene00001840, WBGene00017640, WBGene00009617, WBGene00015916, WBGene00009804, WBGene00011495, WBGene00003963, WBGene00001465, WBGene00001500,	150	305	8801	2.30846	1	0.740343	22.0569
GOTERM_BP_ALL	GO:0006091~generation of precursor metabolites and energy	15	0.0543	0.00546648	WBGene00007536, WBGene00012326, WBGene00001564, WBGene00011495, WBGene00018491, WBGene00000229, WBGene00010705, WBGene00000041, WBGene00015043, WBGene00009805, WBGene00006610, WBGene00009804, WBGene00021355, WBGene00003778, WBGene00018210,	150	384	8801	2.29193	0.999987	0.6405	9.02013
GOTERM_BP_ALL	GO:0005975~carbohydrate metabolic process	12	0.0435	0.00340261	WBGene00003097, WBGene00005019, WBGene00020509, WBGene00022199, WBGene00001564, WBGene00002983, WBGene00008842, WBGene00006610, WBGene00018491, WBGene00016848, WBGene00008948, WBGene00000041,	150	250	8801	2.81632	0.999086	0.688466	5.70863
GOTERM_BP_ALL	GO:0006261~DNA-dependent DNA replication	3	0.0109	0.0527245	WBGene00003156, WBGene00003154, WBGene00004064,	150	22	8801	8.00091	1	0.950483	60.7068
GOTERM_BP_ALL	GO:0006520~amino acid metabolic process	7	0.0254	0.0295521	WBGene00007509, WBGene00007508, WBGene00013516, WBGene00012326, WBGene00021355, WBGene00001993, WBGene00006936, WBGene00018282,	150	138	8801	2.97618	1	0.880402	40.3889
GOTERM_BP_ALL	GO:0050801~ion homeostasis	3	0.0109	0.071023	WBGene00017640, WBGene00009617, WBGene00001500,	150	26	8801	6.77	1	0.972707	71.9313
GOTERM_BP_ALL	GO:0006084~acetyl-CoA metabolic process	3	0.0109	0.0527245	WBGene00001564, WBGene00018491, WBGene00000041,	150	22	8801	8.00091	1	0.950483	60.7068
GOTERM_BP_ALL	GO:0006519~amino acid and derivative metabolic process	7	0.0254	0.0541714	WBGene00007509, WBGene00007508, WBGene00013516, WBGene00012326, WBGene00021355, WBGene00001993, WBGene00006936, WBGene00018282,	150	160	8801	2.56696	1	0.946698	61.7291
GOTERM_BP_ALL	GO:0009416~response to light stimulus	2	0.0072	0.0974024	WBGene00004742, WBGene00001758,	150	6	8801	19.5578	1	0.987513	82.9209
GOTERM_BP_ALL	GO:0009109~coenzyme catabolic process	3	0.0109	0.0443238	WBGene00001564, WBGene00018491, WBGene00000041,	150	20	8801	8.801	1	0.930002	54.2443
GOTERM_BP_ALL	GO:0006082~organic acid metabolic process	11	0.0399	0.00438561	WBGene00007509, WBGene00007508, WBGene00013516, WBGene00001564, WBGene00012326, WBGene00001397, WBGene00018491, WBGene00021355, WBGene00001993, WBGene00006936, WBGene00018282, WBGene00015889,	150	222	8801	2.90724	0.999879	0.724472	7.29977
GOTERM_BP_ALL	GO:0006732~coenzyme metabolic process	7	0.0254	0.0185749	WBGene00001564, WBGene00004068, WBGene00018491, WBGene00001758, WBGene00000229, WBGene00015889, WBGene00000041,	150	124	8801	3.3122	1	0.759652	27.628
GOTERM_BP_ALL	GO:0009411~response to UV	2	0.0072	0.0974024	WBGene00004742, WBGene00001758,	150	6	8801	19.5578	1	0.987513	82.9209
GOTERM_BP_ALL	GO:0045454~cell redox homeostasis	4	0.0145	0.0940445	WBGene00009805, WBGene00009804, WBGene00011495, WBGene00003963,	150	64	8801	3.66708	1	0.986622	81.7914
GOTERM_BP_ALL	GO:0010259~multicellular organismal aging	18	0.0652	6.36583e-09	WBGene00000169, WBGene00001564, WBGene00010791, WBGene00000102, WBGene00004742, WBGene00015259, WBGene00009898, WBGene00010745, WBGene00000912, WBGene00004798, WBGene00003473, WBGene00001840, WBGene00002019, WBGene00016052, WBGene00009213, WBGene00001758, WBGene00001500, WBGene00016716,	150	177	8801	5.96678	1.3069e-05	4.35634e-06	1.09783e-05
GOTERM_BP_ALL	GO:0050790~regulation of catalytic activity	4	0.0145	0.0659373	WBGene00006923, WBGene00001558, WBGene00001558, WBGene00017640,	150	55	8801	4.26715	1	0.967143	69.1601
GOTERM_BP_ALL	GO:0030968~unfolded protein response	3	0.0109	0.0117197	WBGene00002018, WBGene00002019, WBGene00002007,	150	10	8801	17.602	1	0.739352	18.3973
GOTERM_BP_ALL	GO:0009408~response to heat	3	0.0109	0.0117197	WBGene00003473, WBGene00004742, WBGene00000912,	150	10	8801	17.602	1	0.739352	18.3973
GOTERM_BP_ALL	GO:0006869~lipid transport	3	0.0109	0.0327867	WBGene00017220, WBGene00006925, WBGene00006928,	150	17	8801	10.3541	1	0.89785	43.7243
GOTERM_BP_ALL	GO:0006984~ER-nuclear signaling pathway	3	0.0109	0.0117197	WBGene00002018, WBGene00002019, WBGene00002007,	150	10	8801	17.602	1	0.739352	18.3973
GOTERM_BP_ALL	GO:0019752~carboxylic acid metabolic process	11	0.0399	0.00438561	WBGene00007509, WBGene00007508, WBGene00013516, WBGene00001564, WBGene00012326, WBGene00001397, WBGene00018491, WBGene00021355, WBGene00001993, WBGene00006936, WBGene00018282, WBGene00015889,	150	222	8801	2.90724	0.999879	0.724472	7.29977
GOTERM_BP_ALL	GO:0044270~nitrogen compound catabolic process	4	0.0145	0.015113	WBGene00013516, WBGene00021355, WBGene00001993, WBGene00018282,	150	31	8801	7.57075	1	0.713653	23.0969
GOTERM_BP_ALL	GO:0008340~determination of adult life span	18	0.0652	6.36583e-09	WBGene00000169, WBGene00001564, WBGene00010791, WBGene00000102, WBGene00004742, WBGene00015259, WBGene00009898, WBGene00010745, WBGene00000912, WBGene00004798, WBGene00003473, WBGene00001840, WBGene00002019, WBGene00016052, WBGene00009213, WBGene00001758, WBGene00001500, WBGene00016716,	150	177	8801	5.96678	1.3069e-05	4.35634e-06	1.09783e-05
GOTERM_BP_ALL	GO:0009310~amine catabolic process	4	0.0145	0.015113	WBGene00013516, WBGene00021355, WBGene00001993, WBGene00018282,	150	31	8801	7.57075	1	0.713653	23.0969

## Sheet: CREMANEI_GOTERMBP_2
Category	Term	Count	%	PValue	Genes	List Total	Pop Hits	Pop Total	Fold Enrichment	Bonferroni	Benjamini	FDR
GOTERM_BP_2	GO:0008340~determination of adult life span	18	0.0652	5.27931e-09	WBGene00000169, WBGene00001564, WBGene00010791, WBGene00000102, WBGene00004742, WBGene00015259, WBGene00009898, WBGene00010745, WBGene00000912, WBGene00004798, WBGene00003473, WBGene00001840, WBGene00002019, WBGene00016052, WBGene00009213, WBGene00001758, WBGene00001500, WBGene00016716,	143	177	8475	6.02702	6.1768e-07	6.1768e-07	6.03251e-06
GOTERM_BP_2	GO:0006952~defense response	5	0.0181	0.0125013	WBGene00006923, WBGene00008591, WBGene00009213, WBGene00004758, WBGene00000912,	143	54	8475	5.48757	0.770503	0.16805	13.3894
GOTERM_BP_2	GO:0006950~response to stress	13	0.0471	0.00041153	WBGene00007516, WBGene00013924, WBGene00013244, WBGene00002263, WBGene00004742, WBGene00001852, WBGene00004064, WBGene00000912, WBGene00002018, WBGene00003473, WBGene00002019, WBGene00002007, WBGene00001758,	143	227	8475	3.39407	0.0470177	0.0159248	0.469235
GOTERM_BP_2	GO:0065009~regulation of a molecular function	4	0.0145	0.0700381	WBGene00006923, WBGene00001558, WBGene00001558, WBGene00017640,	143	57	8475	4.159	0.999796	0.538062	56.3824
GOTERM_BP_2	GO:0065008~regulation of biological quality	12	0.0435	0.0132918	WBGene00004735, WBGene00002045, WBGene00009805, WBGene00001840, WBGene00017640, WBGene00009617, WBGene00015916, WBGene00009804, WBGene00011495, WBGene00003963, WBGene00001465, WBGene00001500,	143	305	8475	2.33177	0.79103	0.159663	14.1784
GOTERM_BP_2	GO:0042221~response to chemical stimulus	8	0.029	0.0104611	WBGene00007516, WBGene00006923, WBGene00002018, WBGene00003473, WBGene00002019, WBGene00020909, WBGene00002007, WBGene00001758,	143	144	8475	3.29254	0.707822	0.161189	11.3226
GOTERM_BP_2	GO:0019725~cellular homeostasis	6	0.0217	0.0138298	WBGene00009805, WBGene00017640, WBGene00009804, WBGene00011495, WBGene00003963, WBGene00001500,	143	85	8475	4.18346	0.803948	0.150356	14.7116
GOTERM_BP_2	GO:0006810~transport	33	0.1196	0.080173	WBGene00019803, WBGene00000169, WBGene00016970, WBGene00001558, WBGene00004753, WBGene00009666, WBGene00015381, WBGene00000229, WBGene00022808, WBGene00006928, WBGene00000176, WBGene00011596, WBGene00008084, WBGene00009805, WBGene00009804, WBGene00021355, WBGene00004003, WBGene00014030, WBGene00003778, WBGene00001500, WBGene00000170, WBGene00004062, WBGene00017220, WBGene00009617, WBGene00006925,…	143	1497	8475	1.30646	0.999943	0.557274	61.5159
GOTERM_BP_2	GO:0006807~nitrogen compound metabolic process	11	0.0399	0.00170225	WBGene00007509, WBGene00007508, WBGene00017440, WBGene00013516, WBGene00012326, WBGene00002983, WBGene00008842, WBGene00017429, WBGene00021355, WBGene00001993, WBGene00006936, WBGene00018282,	143	197	8475	3.30925	0.180723	0.048612	1.92794
GOTERM_BP_2	GO:0007568~aging	18	0.0652	5.27931e-09	WBGene00000169, WBGene00001564, WBGene00010791, WBGene00000102, WBGene00004742, WBGene00015259, WBGene00009898, WBGene00010745, WBGene00000912, WBGene00004798, WBGene00003473, WBGene00001840, WBGene00002019, WBGene00016052, WBGene00009213, WBGene00001758, WBGene00001500, WBGene00016716,	143	177	8475	6.02702	6.1768e-07	6.1768e-07	6.03251e-06
GOTERM_BP_2	GO:0009628~response to abiotic stimulus	4	0.0145	0.0853341	WBGene00003473, WBGene00004742, WBGene00001758, WBGene00000912,	143	62	8475	3.8236	0.999971	0.551913	63.9123
GOTERM_BP_2	GO:0006091~generation of precursor metabolites and energy	15	0.0543	0.0049474	WBGene00007536, WBGene00012326, WBGene00001564, WBGene00011495, WBGene00018491, WBGene00000229, WBGene00010705, WBGene00000041, WBGene00015043, WBGene00009805, WBGene00006610, WBGene00009804, WBGene00021355, WBGene00003778, WBGene00018210,	143	384	8475	2.31507	0.44026	0.109575	5.50967
GOTERM_BP_2	GO:0009056~catabolic process	11	0.0399	0.00892683	WBGene00022199, WBGene00013516, WBGene00001564, WBGene00008842, WBGene00018491, WBGene00017316, WBGene00021355, WBGene00001993, WBGene00008948, WBGene00018282, WBGene00000041,	143	249	8475	2.61816	0.649757	0.160421	9.73876
