# Supplementary material for: Phenotypic Covariance of Longevity, Immunity and Stress Resistance in the Caenorhabditis Nematodes
Source: PLoS One. 2010 Apr 1;5(4):e9978. doi: 10.1371/journal.pone.0009978 (PMC2848519; doi:10.1371/journal.pone.0009978)
Supplement: Table S9 — Table represents the coefficients of determination (r2) for all template/primer combinations. Once amplification efficiencies of the target and the reference genes were determined to be approximately equal, RT PCRs were carried out for all the experimental conditions. (0.02 MB XLS) [file pone.0009978.s013.xls]

## Sheet: Sheet1
R2 Value	daf-16	gpd-3	18s RNA									af/daf16/gpd	adult
												cb/daf16/gpd	adult
C. elegans hermaphrodites	0.99036	0.99542	0.99565									em/daf16/gpd	L4
C. elegans males	0.99952	0.99584	0.99501
C. briggsae hermaphrodites	0.93219	0.99008	-
C. brenneri males and hermaphrodites	0.99927	0.98738	-
C. remanei males and hermaphrodites	0.99813	0.98323	-
